# Supplementary material for: A role for the RNA pol II–associated PAF complex in AID-induced immune diversification
Source: PubMed Central journal article supplement — J Exp Med. 2012 Oct 22;209(11):2099–111. doi: 10.1084/jem.20112145 (PMC3478926; doi:10.1084/jem.20112145), 2012-10-22
Supplement: supp_jem.20112145_JEM_20112145_sm.pdf [file supp_jem.20112145_JEM_20112145_sm.pdf]

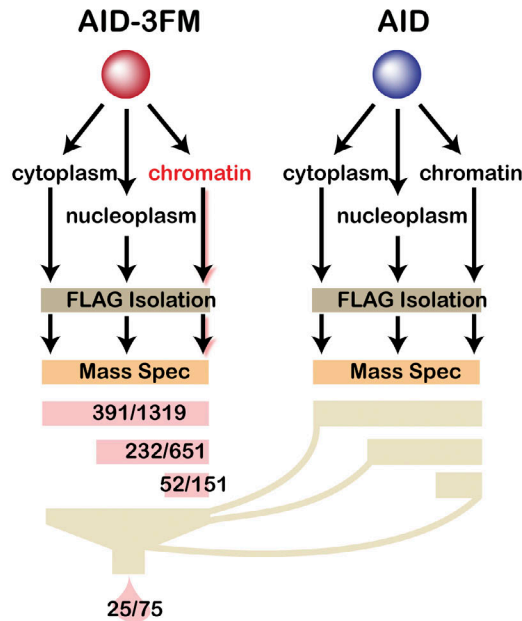

| Filtered Proteins                              | Name          | Complex               | kD           | NC       | NA        | CC       | CA        |
|------------------------------------------------|---------------|-----------------------|--------------|----------|-----------|----------|-----------|
| Transcription elongation factor SPT5           | SUPT5H        | DSIF                  | 120 kD       | 0        | 0         | 0        | 11        |
| Splicing factor 3A                             | SF3A          |                       | 89 kD        | 0        | 4         | 0        | 8         |
| RNA polymerase-associated protein CTR9 homolog | CTR9          | PAF                   | 134 kD       | 0        | 0         | 0        | 6         |
| DNA-directed RNA polymerase II subunit RPB2    | RNA pol II B2 | core RNA pol II       | 134 kD       | 0        | 0         | 0        | 6         |
| DNA-directed RNA polymerase II subunit RPB1    | RNA pol II B1 | core RNA pol II       | 217 kD       | 1        | 0         | 0        | 5         |
| RNA polymerase II-associated factor 1 homolog  | PAF1          | PAF                   | 60 kD        | 0        | 0         | 0        | 4         |
| Transcription elongation factor SPT6           | SUPT6H        | chromatin/ elongation | 199 kD       | 0        | 0         | 0        | 4         |
| Lamin-B2                                       | Lamin B2      |                       | 68 kD        | 0        | 0         | 0        | 4         |
| DNA topoisomerase I                            | DNA Topo I    |                       | 91 kD        | 0        | 0         | 0        | 2         |
| ATP-dependent RNA helicase DDX3Y               | DDX3Y         |                       | 72 kD        | 0        | 1         | 0        | 2         |
| Interleukin enhancer binding factor 3          | IL3IF         |                       | 77 kD        | 0        | 1         | 0        | 2         |
| RNA polymerase-associated protein LEO1         | LEO1          | PAF                   | 75 kD        | 0        | 0         | 0        | 2         |
| DNA replication licensing factor MCM5          | MCM5          |                       | 82 kD        | 0        | 0         | 0        | 2         |
| WD40 repeat-containing protein SMU1            | SMU1          |                       | 57 kD        | 0        | 0         | 0        | 2         |
| Nuclease-sensitive element-binding protein 1   | YBOX1         |                       | 36 kD        | 0        | 1         | 0        | 1         |
| Pre-mRNA-processing factor 6                   | PRP6          |                       | 107 kD       | 0        | 1         | 0        | 1         |
| Putative uncharacterized protein               | Unknown       |                       | 72 kD        | 0        | 0         | 0        | 1         |
| U4/U6 small nuclear ribonucleoprotein Prp4     | PRP4          |                       | 58 kD        | 0        | 0         | 0        | 1         |
| FACT complex subunit SPT16                     | SPT16         | FACT                  | 120 kD       | 0        | 0         | 0        | 1         |
| ATP-dependent RNA helicase DDX1                | DDX1          |                       | 82 kD        | 0        | 0         | 0        | 1         |
| FACT complex subunit SSRP1                     | SSRP1         | FACT                  | 80 kD        | 0        | 0         | 0        | 1         |
| Uncharacterized protein C17orf85 homolog       | C17orf85      |                       | 69 kD        | 0        | 0         | 0        | 1         |
| Lamin-B1                                       | Lamin B1      |                       | 67 kD        | 0        | 0         | 0        | 1         |
| Splicing factor 3B subunit 1                   | SF3B          |                       | 146 kD       | 0        | 4         | 1        | 3         |
| ATP-dependent RNA helicase DDX15               | DDX15         |                       | 88 kD        | 1        | 2         | 0        | 3         |
|                                                |               |                       | <b>Total</b> | <b>2</b> | <b>14</b> | <b>1</b> | <b>75</b> |

**Figure S1. Immunoprecipitation of AID from chromatin of DT40 and complex analysis.** (a) Schematic of complex isolation and analysis. DT40 cells expressing tagged AID-3FM (red) and untagged AID (blue, control) were fractionated into cytoplasm, nucleoplasm, and chromatin. Each fraction was then subjected to FLAG bead IP and Mass Spec analysis. A total of 1,319 peptides (391 proteins) were identified from all AID-3FM fractions, with 151 peptides (52 proteins) from the chromatin fraction only. The equivalent Mass Spec dataset from control cells was used as a filter to remove false positives (yellow lines/boxes), leaving 75 peptides (25 proteins). (b) Table of the peptide ids from Mass Spec analysis of AID-3FM - chromatin fraction after filtering. NC, nucleoplasm control; NA, nucleoplasm AID-3FM; CC, chromatin control; CA, chromatin AID-3FM. RNA pol II B1 was included because it usually associates with RNA pol II B2, and this complex has 11 peptides with AID and 1 without. SF3B was included because it associates with SF3A, and this complex has 19 peptides with AID and 1 without. DDX15 was included because it has five peptides with AID and one without.

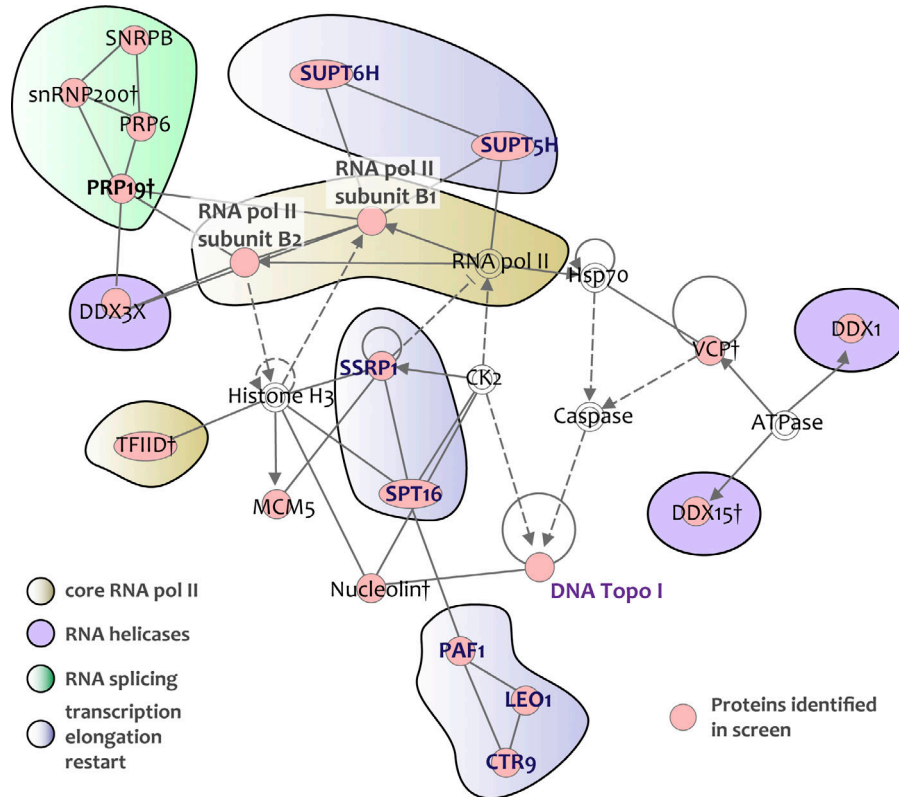

**Figure S2.** Filtered AID chromatin mass spec ID data were submitted to the Ingenuity Systems Pathway Analysis gene network software and allowed to generate a Network tree, receiving a tree score of 75. A second tree was also generated, and it obtained a score of 22. Those proteins that were also detected in the control dataset were removed from the tree. Proteins marked with a † were specific (0 peptides in control) or highly enriched (<15% in control) in the chromatin AID fraction, but less or nonspecific in the nucleoplasm. Identified proteins are in light red, solid lines represent direct interactions, dashed lines represent functional interactions. Color schemes as indicated.

**Table S1.** Primer sequences

| Gene                          | Primer 1 – sequence             | Primer 2 – sequence            | Reference / Name      | Purpose   |
|-------------------------------|---------------------------------|--------------------------------|-----------------------|-----------|
| <i>CD79b</i>                  | 5'-CCACACTGGTGTCTCTCC-3'        | 5'-GGGCTTCCTGGAAATTCAG-3'      |                       | qRT-PCR   |
| <i>HPRT</i>                   | 5'-GTTGGATACAGGCCAGACTTTGTTG-3' | 5'-GATTCAACTGCGCTCATCTTAGGC-3' |                       | qRT-PCR   |
| <i>GLT<math>\alpha</math></i> | 5'-CAAGAAGGAGAAGGTGATTGAG-3'    | 5'-GAGCTGGTGGGAGTGTGAGT-3'     |                       | qRT-PCR   |
| <i>GLT<math>\mu</math></i>    | 5'-ACCTGGGAATGTATGGTTGTGGCTT-3' | 5'-TCTGAACCTTCAAGGATGCTCTTG-3' |                       | qRT-PCR   |
| <i>SPT5</i>                   | 5'-TGCACCTGCAAGAAGCTGGTGG-3'    | 5'-GCTCATAGGAGTGAAGCCACCA-3'   | OriGene<br>(MP216410) | qRT-PCR   |
| <i>PAF1</i>                   | 5'-GGAGGAAGAGATGGAGGCTGAA-3'    | 5'-CACTGCCTCATCTCTGTACC-3'     | OriGene<br>(MP210531) | qRT-PCR   |
| <i>LEO1</i>                   | 5'-GAGGAGCAAGACCAGAAGTCA-3'     | 5'-TGTCGCTGTCTGCTCGGAATC-3'    | OriGene<br>(MP207353) | qRT-PCR   |
| <i>CTR9</i>                   | 5'-GTGACACCTACTCTATGCTGGC-3'    | 5'-TGGCAGCATACAGGTTCTTGGC-3'   | OriGene<br>(MP203022) | qRT-PCR   |
| <i>CDC73</i>                  | 5'-GAGAGAGTGTGGAGGACAAGAAC-3'   | 5'-GCACGACCTTCTCTCTGGCTT-3'    | OriGene<br>(MP202272) | qRT-PCR   |
| <i>AID</i>                    | 5'-GAAAGTCACGCTGGAGCCG-3'       | 5'-TCTCATGCCGTCCTTGG-3'        |                       | qRT-PCR   |
| <i>MSH2</i>                   | 5'-GGGATGTGACGAAGCCGAGCC-3'     | 5'-TGCTCTCCTCCGACATGGCAGT-3'   |                       | qRT-PCR   |
| <i>MSH6</i>                   | 5'-CTCGTCGCCGGAGGCAAAGG-3'      | 5'-TAGGCAAGGCCACCAGGGGT-3'     |                       | qRT-PCR   |
| <i>UNG</i>                    | 5'-GTCTATCCGCCCCCGGAGCA-3'      | 5'-AACTGGGCGGGGTGGAAGT-3'      |                       | qRT-PCR   |
| <i>HeLa A</i>                 | 5'-CTCCGAGCGGAGACTCTAGAG-3'     | 5'-CGTACGTGATGTTACCTCG-3'      | KMS6703 /<br>KMS6716  | ChIP-qPCR |
| <i>HeLa B</i>                 | 5'-GAAGCGAAGGTTGTGGATCTG-3'     | 5'-CTTGTAATCAAGGCGTTGGTC-3'    | KMS6705 /<br>KMS6706  | ChIP-qPCR |
| <i>DT40 1</i>                 | 5'-CCTTCACGATTCTCCGGTTC-3'      | 5'-CACCTAGGACGGTCAGGGTT-3'     | DS4506 / DS4507       | ChIP-qPCR |
| <i>DT40 2</i>                 | 5'-CCTTCACGATTCTCCGGTTC-3'      | 5'-TTCCCCAATTGCTTTGTGTAC-3'    | DS4506 / DS4516       | ChIP-qPCR |
| <i>DT40 3</i>                 | 5'-CATCCCATCACTTCTGACCC-3'      | 5'-CACCTAGGACGGTCAGGGTT-3'     | DS4517 / DS4507       | ChIP-qPCR |
| <i>DT40 4</i>                 | 5'-CCTTGAAGAGGTGAGGAGG-3'       | 5'-GCAGAAACAGCCCAAGCAGC-3'     | KMS6911 /<br>KMS6912  | ChIP-qPCR |
| <i>DT40 5</i>                 | 5'-CAGAGGTGCATGTGTGTCTG-3'      | 5'-GTTGAGTCTCTCTTTGACG-3'      | KMS6915 /<br>KMS6916  | ChIP-qPCR |

**Table S2.** shRNA (single and sets)

| Target     | Vector | Sequence                            | Reference      | Source          |
|------------|--------|-------------------------------------|----------------|-----------------|
| PAF1       | RV-1   | 5'-GGTGACGGAGTTTACTACAATGAGCTGGA-3' | GI518753       | OriGene         |
| LEO1       | RV-1   | 5'-GTGGCAGTGACAATCACTCTGAACGGTCA-3' | GI529047       | OriGene         |
| CTR9       | RV-1   | 5'-GATGAGGATCCGACAGTGACCAGCCGTC-3'  | GI528588       | OriGene         |
| CDC73      | RV-1   | 5'-GACGTGCTCAGCGTCTGCGACAGTACAA-3'  | GI561719       | OriGene         |
| SPT5       | RV-1   | 5'-GCTTGGCTACTGGAACAGCAGATGGTGC-3'  | GI336016       | OriGene         |
| non-target | RV-1   | 5'-GCACTACCAGAGCTAACTCAGATAGTACT-3' | TR30007        | OriGene         |
| AID        | RV-2   | 5'-ACCAGTCGCCATTATAATGCAA-3'        |                | Open BioSystems |
| PAF1       | LV     | 5'-GAACCAGTTTGTGGCTTATTT-3'         | TRCN0000197886 | Sigma-Aldrich   |
| LEO1       | LV     | 5'-GACTTGGGCAATGACTTATAT-3'         | TRCN0000243542 | Sigma-Aldrich   |
| AID        | LV     | 5'-GCGAGATGCATTTCTGTATGTT-3'        | TRCN0000112031 | Sigma-Aldrich   |
| non-target | LV     | 5'-CAACAAGATGAAGAGCACCAA-3'         |                | Sigma-Aldrich   |

Vectors: RV-1, pGFP-V-RS (retrovirus); RV-2, pLMP (retrovirus); LV, pLKO.1-puro-CMV-TurboGFP<sup>+</sup> (lentivirus).

**Table S3.** Antibodies

| Antibody    | Clone       | Source                    | Usage           |
|-------------|-------------|---------------------------|-----------------|
| FLAG        | M2          | Sigma-Aldrich             | IP, Western     |
| PAF1        | ab20662     | Abcam                     | Western         |
| PAF1        | A300-172A   | Bethyl Laboratories       | Western, ChIP   |
| PAF1        | A300-173A   | Bethyl Laboratories       | ChIP            |
| LEO1        | A300-175A   | Bethyl Laboratories       | Western         |
| LEO1        | ab70630     | Abcam                     | Western, ChIP   |
| CTR9        | A301-395A   | Bethyl Laboratories       | Western         |
| CDC73       | ab43256     | Abcam                     | Western         |
| SUPT5H      | ab26259     | Abcam                     | Western         |
| SUPT5H      | sc-28678    | Santa Cruz                | Western, IP     |
| SUPT6H      | NB100-2582  | Novus Biologicals         | IP              |
| SUPT6H      | A300-801A   | Bethyl Laboratories       | Western         |
| RNA pol II  | ab5408      | Abcam                     | Western, IP     |
| AID         | Strasbg 9   | (Jeevan-Raj et al., 2011) | Western         |
| AID         |             | (Pavri et al., 2010)      | ChIP            |
| AID         | Ab59361     | Abcam                     | Western         |
| AID         | h52-1       | (Conticello et al., 2008) | IP              |
| Myc peptide | 9E10        | CRUK                      | Western         |
| CD40        | HM40-3      | eBioscience               | CSR stimulation |
| GFP         | Ab290       | Abcam                     | IP              |
| GFP         | 11814460001 | Roche                     | Western         |
| rabbit IgGs | Ab37415-5   | Abcam                     | ChIP            |
| rabbit IgGs | Ab27478     | Santa Cruz                | ChIP            |
